# Supplementary material for: Population demography of Oldham’s leaf turtle (Cyclemys oldhamii) in protected and disturbed habitats in Thailand
Source: PeerJ. 2019 Jul 2;7:e7196. doi: 10.7717/peerj.7196 (PMC6611445; doi:10.7717/peerj.7196)
Supplement: Data S2 [file peerj-07-7196-s002.xlsx]

## Sheet: Sheet1
Site	New cap/Recap	Turtle no.	Visit	Survey bout	Date	Time	Location	New location	Notch code (mark code)	Sex (M,F,J)	# of rings on plastron scutes	Age	Carapace length (mm)	Carapace width (mm)	Shell height (mm)	Plastron length (mm)	Plastron width (mm)	Weight (g)
SS	N	1	1	1	2014-08-05	09:25:00	BBP1	BBP1	L1	F	>15	16	223	153.9	80.3	197.2	117.8	>1000
SS	N	2	1	1	2014-08-05	10:08:00	BBP1	BBP1	L2	M	>15	16	189.2	129.2	61.1	169.5	95	703
SS	N	3	1	1	2014-08-05	10:08:00	BBP1	BBP1	L3	F	>15	16	194.7	152.2	76.9	180.3	115	999
SS	R	1	2	1	2014-08-31	10:00:00	BBP1	BBP1	L1	F	>15	16	223.6	154.5	80.9	197.8	117.6	1260
SS	N	4	2	1	2014-08-31	10:36:00	BBP1	BBP1	L8	F	7	7	134	114.9	49.8	121.9	83.1	300
SS	R	4	2	1	2014-09-01	10:10:00	BBP1	BBP1	L8	F	7	7	134	114.9	49.8	121.9	83.1	300
SS	N	5	2	1	2014-08-31	11:32:00	BBP2	BBP2	L9a	J	4	4	101.9	94.8	35.9	91.5	67.5	150
SS	N	6	2	1	2014-09-01	10:18:00	BBP2	BBP2	L10	F	>15	16	171	133.5	62.2	153.8	100.1	640
SS	N	7	2	1	2014-09-01	10:41:00	BBP2	BBP2	L11	M	>15	16	201	155.8	77.8	181.1	116.9	1200
SS	N	8	2	1	2014-09-01	11:04:00	BBP2	BBP2	L12	F	>15	16	199	144.1	77.7	202.3	118.8	1130
SS	N	9	2	1	2014-09-01	11:04:00	BBP2	BBP2	R1	F	>15	16	231.5	162.8	77.9	212.9	123.2	1500
SS	R	5	3	1	2014-10-13	10:00:00	BBP2	BBP2	L9a	J	4	4	102	95	36.8	91.2	68.1	146
SS	N	10	3	1	2014-10-12	10:10:00	BBP2	BBP2	R2	M	>15	16	208.5	144.2	70.25	187.9	114.5	1050
SS	N	11	3	1	2014-10-12	10:10:00	BBP1	BBP1	R3	F	>15	16	230	152.2	76.2	190	123.4	1150
SS	N	12	3	1	2014-10-13	09:45:00	BBP2	BBP2	L2R8	J	1<	0	55	51	20	46.9	34.8	20
SS	N	13	3	1	2014-10-13	10:00:00	BBP2	BBP2	L2R2	J	1<	0	49	48.1	17.9	41.2	34.1	16.2
SS	N	14	3	1	2014-10-13	11:00:00	BKT	BKT	R8	M	>15	16	186.5	141.3	61.2	172.8	111	780
SS	N	15	4	1	2014-11-14	09:50:00	BBP1	BBP1	R9	F	8	8	116.9	98.4	40.8	102	71.9	198
SS	N	16	4	1	2014-11-14	10:54:00	BBP2	BBP2	R10	J	hatching	0	60.9	57.7	21.8	53.4	40.6	28
SS	N	17	4	1	2014-11-14	11:47:00	BKT	BKT	R11	J	6	6	110.9	95.1	38.2	100.4	72.9	179
SS	N	18	4	1	2014-11-15	09:30:00	BKT	BKT	L3R12	M	12	12	155	122.9	53.2	137.2	92.9	452
SS	N	19	4	1	2014-11-15	10:24:00	BBP1	BBP1	L1R1	F	7	7	121.4	104.3	41.2	106	76.95	205
SS	N	20	4	1	2014-11-15	10:47:00	BBP1	BBP1	L1R2	F	9	9	131	106.8	47.4	118.8	81.8	289
SS	R	7	5	2	2014-12-14	10:52:00	BBP2	BBP2	L11	M	>15	16	201.7	155.2	77.7	186.2	116.9	1245
SS	N	21	5	2	2014-12-13	13:54:00	BKT	BKT	L1R3	J	6	6	107	97.8	35.8	94.2	71.6	156
SS	N	22	5	2	2014-12-13	13:54:00	BKT	BKT	L1R8	J	4	4	97.8	89	37.6	88.2	67.9	130
SS	R	22	5	2	2014-12-14	10:15:00	BKT	BKT	L1R8	J	4	4	97.8	89	37.6	88.2	67.9	130
SS	N	23	5	2	2014-12-13	14:30:00	BBP1	BBP1	L1R9	J	2	2	65.1	63.1	26.1	57.4	45.2	44.1
SS	N	24	5	2	2014-12-13	14:54:00	BBP2	BBP2	no make	J	7	7	111.05	no maesure	41.2	103.8	70.9	189
SS	N	25	5	2	2014-12-13	14:54:00	BBP2	BBP2	L1R4	M	>15	16	180.2	134.9	62	160	105	763
SS	N	26	5	2	2014-12-13	14:54:00	BBP2	BBP2	L1R10	J	4	4	97.5	86.9	36.8	86	65.2	143
SS	N	27	5	2	2014-12-13	14:54:00	BBP2	BBP2	L2R1	J	2	2	75	67.3	27.7	67.9	48	60.2
SS	N	28	5	2	2014-12-13	14:54:00	BBP2	BBP2	L1R11	M	>15	16	187.6	144.1	64.9	163.2	106.1	719
SS	N	29	5	2	2014-12-14	10:52:00	BBP2	BBP2	L1R12	F	>15	16	208	154.9	74.5	188	115.3	1059
SS	R	5	6	2	2015-01-17	11:00:00	BBP2	BBP2	L9a	J	6	6	102.6	96	36	93.1	68.8	159
SS	R	6	6	2	2015-01-17	11:00:00	BBP2	BBP2	L10	F	>15	16	175.2	134.95	66	161.1	103.6	773
SS	R	28	6	2	2015-01-17	11:00:00	BBP2	BBP2	L1R11	M	>15	16	187.2	144	64.3	163.2	110.2	794
SS	N	30	6	2	2015-01-16	10:55:00	BBP2	BBP2	L2R3	J	1	1	61.3	55.5	22.1	52.9	38.3	29
SS	R	3	7	2	2015-03-06	09:43:00	BBP2	BBP2	L3	F	>15	16	194.9	149.9	72.5	181.3	115.7	1010
SS	R	5	7	2	2015-03-06	09:43:00	BBP2	BBP2	L9a	J	7	7	104	96.1	36.8	94.8	69.8	165
SS	R	8	7	2	2015-03-06	10:50:00	BBP1	BBP1	L12	F	>15	16	199	145.7	78.6	203	118.9	1102
SS	R	15	7	2	2015-03-06	10:30:00	BBP1	BBP1	R9	F	8	8	118.3	99.2	40.6	104.5	72.3	195
SS	R	16	7	2	2015-03-06	09:23:00	BBP2	BBP2	R10	J	hatch	0	65.4	62.3	22.2	56.2	43.2	31.5
SS	R	19	7	2	2015-03-06	11:24:00	BBP1	BBP1	L1R1	F	6	6	124.1	104.2	43.1	109.4	78.2	220
SS	R	20	7	2	2015-03-06	11:50:00	BBP1	BBP1	L1R2	F	6	6	131.8	106.2	48	119.6	81.9	298
SS	R	25	7	2	2015-03-07	11:15:00	BBP1	BBP1	L1R4	M	>15	16	179.95	135	63	160.2	105.2	745
SS	N	31	7	2	2015-03-06	10:06:00	BBP2	BBP2	L2R4	J	7	7	125.8	108.95	45.2	116.7	80.1	280
SS	N	32	7	2	2015-03-06	10:50:00	BBP1	BBP1	L2R9	M	>15	16	176.7	132	62.1	160.1	99.8	654
SS	N	33	7	2	2015-03-06	11:24:00	BBP1	BBP1	L2R10	F	12	12	160	132.9	58.6	144.5	102.9	545
SS	N	34	7	2	2015-03-07	10:13:00	BKT	BKT	L8R2	J	2	2	62.7	61.2	24.2	59.4	44.2	36.8
SS	N	35	7	2	2015-03-07	11:01:00	BBP1	BBP1	L2R11	M	11	11	143.7	123.8	50	129.8	93.95	380
SS	R	4	8	2	2015-04-02	09:13:00	BBP1	BBP1	L8	F	7	7	141.1	118.8	50.8	129.5	85.5	360
SS	R	15	8	2	2015-04-02	09:23:00	BBP1	BBP1	R9	F	8	8	120.3	100	42.1	105.9	73.3	210
SS	R	16	8	2	2015-04-03	10:08:00	BBP2	BBP2	R10	J	1	1	67.7	64	22.95	58.9	44.6	36.8
SS	R	19	8	2	2015-04-03	09:18:00	BBP1	BBP1	L1R1	F	7	7	126.2	108.8	40.5	111.9	79.1	245
SS	R	23	8	2	2015-04-03	10:08:00	BBP2	BBP2	L1R9	J	2	2	67.8	65.8	27	60	47.2	50.1
SS	R	27	8	2	2015-04-03	09:44:00	BBP2	BBP2	L2R1	J	2	2	75.9	69.9	27.8	69	48.5	61.5
SS	R	28	8	2	2015-04-02	10:04:00	BBP2	BBP2	L1R11	M	>15	16	187.1	147.2	64.2	162.4	111.1	728
SS	R	33	8	2	2015-04-03	09:18:00	BBP1	BBP1	L2R10	F	13	13	163.6	135	60	146.5	104	570
SS	N	36	8	2	2015-04-02	09:23:00	BBP1	BBP1	L2R12	F	>15	16	201.8	142.5	71.6	183.8	109.8	1010
SS	N	37	8	2	2015-04-02	10:04:00	BBP2	BBP2	L3R1	M	>15	16	187.8	141.2	61.2	158.5	99.9	663
SS	R	4	9	3	2015-05-06	09:44:00	BBP1	BBP1	L8	F	7	7	143.2	120.6	48.9	132.4	86.6	363
SS	R	11	9	3	2015-05-06	09:24:00	BBP1	BBP1	R3	F	>15	16	211	156.8	76	190.3	123.1	1320
SS	R	23	9	3	2015-05-06	10:09:00	BBP2	BBP2	L1R9	J	2	2	69.8	66.2	28	61.9	48.7	52.5
SS	R	23	9	3	2015-05-07	09:35:00	BBP2	BBP2	L1R9	J	2	2	69.8	66.2	28	61.9	48.7	52.5
SS	R	24	9	3	2015-05-06	10:09:00	BBP2	BBP2	no make	J	6	6	111.2	no	41.8	103	no	178
SS	R	35	9	3	2015-05-07	09:23:00	BBP1	BBP1	L2R11	M	11	11	143.8	124.3	51.3	130	94.3	385
SS	N	38	9	3	2015-05-07	09:23:00	BBP1	BBP1	L3R2	F	13	13	160	140.7	65.9	164.8	145.1	750
SS	R	15	10	3	2015-06-08	09:48:00	BBP1	BBP1	R9	F	8	8	126.1	104.6	42.2	111.5	75.7	238
SS	R	16	10	3	2015-06-09	10:05:00	BBP2	BBP2	R10	J	1	1	69.3	66.3	22.8	60.4	45.3	38
SS	R	22	10	3	2015-06-07	09:38:00	BKT	BKT	L1R8	J	4	4	100.9	92.4	40.6	92.2	69.8	155
SS	R	32	10	3	2015-06-07	10:49:00	BBP1	BBP1	L2R9	M	>15	16	176.8	133.4	62.3	160.5	100	738
SS	R	34	10	3	2015-06-07	09:51:00	BKT	BKT	L8R2	J	2	2	81	76.5	29.9	72.1	56.1	73.9
SS	N	39	10	3	2015-06-07	10:07:00	BBP1	BBP1	L3R3	F	>15	16	203.4	152.9	75.2	187.7	113.2	1120
SS	N	40	10	3	2015-06-07	10:49:00	BBP1	BBP1	L3R4	J	3	3	103	93.5	37	91.2	66.9	157
SS	R	4	11	3	2015-07-26	10:00:00	BBP1	BBP1	L8	F	8	8	145	122.3	50.9	134.75	88.6	373
SS	R	18	11	3	2015-07-25	10:39:00	BKT	BKT	L3R12	M	12	12	154.9	123.6	53.5	138.7	92.1	440
SS	R	22	11	3	2015-07-25	11:09:00	BKT	BKT	L1R8	J	4	4	101	92.8	39.9	92.2	70.2	150
SS	R	32	11	3	2015-07-25	09:54:00	BBP1	BBP1	L2R9	M	>15	16	176.9	132.3	65	159.6	99.6	710
SS	R	32	11	3	2015-07-27	09:14:00	BBP1	BBP1	L2R9	M	>15	16	176.9	132.3	65	159.6	99.6	710
SS	R	40	11	3	2015-07-25	09:30:00	BBP1	BBP1	L3R4	J	4	4	105.2	93.9	37.7	93.9	67.8	158
SS	N	41	11	3	2015-07-25	09:30:00	BBP1	BBP1	L9R12	F	>15	16	199	151.6	77.5	199.2	120.5	1090
SS	N	42	11	3	2015-07-25	10:15:00	BBP2	BBP2	L3R8	J	7	7	123.2	110.2	45.8	115.7	83.2	238
SS	N	43	11	3	2015-07-25	10:39:00	BKT	BKT	L8R1	F	10	10	161.2	127.6	54.9	146.8	97	534
SS	N	44	11	3	2015-07-26	10:40:00	BKT	BKT	L3R9	M	>15	16	191	138.4	65	171.5	106.9	865
SS	N	45	11	3	2015-07-27	09:10:00	BBP2	BBP2	L3R10	F	>15	16	210.8	158	80.2	196.5	117.1	1210
SS	R	15	12	3	2015-08-21	09:35:00	BBP1	BBP1	R9	F	8	8	132.2	107.8	47.3	116.7	80	281
SS	R	15	12	3	2015-08-22	09:57:00	BBP1	BBP1	R9	F	8	8	132.2	107.8	47.3	116.7	80	281
SS	R	18	12	3	2015-08-22	09:03:00	BKT	BKT	L3R12	M	10	10	154.9	122.1	52.1	137.7	92.3	438
SS	R	19	12	3	2015-08-20	09:13:00	BBP1	BBP1	L1R1	F	8	8	132	111.8	45.1	116.3	81.9	271
SS	R	20	12	3	2015-08-22	09:57:00	BBP1	BBP1	L1R2	F	7	7	132.6	107.8	48	121.8	82.2	290
SS	R	32	12	3	2015-08-22	10:11:00	BBP1	BBP1	L2R9	M	>15	16	176.95	132.4	65.2	160.2	100.8	705
SS	R	33	12	3	2015-08-20	09:42:00	BBP1	BBP1	L2R10	F	12	12	174.2	140.1	65.2	155.95	109	658
SS	R	43	12	3	2015-08-21	09:05:00	BKT	BKT	L8R1	F	10	10	162	128.1	54.5	147.05	96.2	550
SS	R	15	13	4	2015-09-10	10:00:00	BBP1	BBP1	R9	F	8	8	132.95	106	47	116.6	77.3	274
SS	R	16	13	4	2015-09-12	09:49:00	BBP2	BBP2	R10	J	3	3	75.2	72.4	25.2	66.6	49.9	55.8
SS	R	23	13	4	2015-09-11	09:45:00	BBP2	BBP2	L1R9	J	3	3	79.9	75.8	30.8	71.3	54.2	82.8
SS	R	26	13	4	2015-09-10	10:00:00	BBP1	BBP1	L1R10	J	5	5	107.9	96.3	39.2	95.7	69.8	180
SS	R	31	13	4	2015-09-11	10:14:00	BBP1	BBP1	L2R4	F	8	8	136.9	114.9	48.9	116.6	84.7	345
SS	R	40	13	4	2015-09-12	10:17:00	BBP1	BBP1	L3R4	J	5	5	108.5	96.4	38.7	97.35	69.9	180
SS	N	46	13	4	2015-09-11	09:29:00	BKT	BKT	no	J	<1	0	49.8	45.8	18	42.1	30.8	15.5
SS	N	47	13	4	2015-09-12	09:22:00	BKT	BKT	L8R3	F	8	8	134.2	117.5	49.2	122.9	88.2	325
SS	R	4	14	4	2016-01-23	09:46:00	BBP1	BBP1	L8	F	8	8	146.8	123.9	51.9	136.2	89	383
SS	R	23	14	4	2016-01-22	09:44:00	BBP2	BBP2	L1R9	J	4	4	90.8	83.8	34	82	60.2	105
SS	R	23	14	4	2016-01-23	09:15:00	BBP2	BBP2	L1R9	J	4	4	90.8	83.8	34	82	60.2	105
SS	R	40	14	4	2016-01-21	11:16:00	BBP1	BBP1	L3R4	J	6	6	115.5	102	41.2	103.5	74.2	208
SS	N	48	14	4	2016-01-21	09:50:00	BKT	BKT	L8R8	J	hatching	0	62.3	59	22.7	54.2	39.1	32.5
SS	N	49	14	4	2016-01-21	09:50:00	BKT	BKT	L8R9	J	hatching	0	61.8	58.5	22.7	53.2	39.8	30.5
SS	N	50	14	4	2016-01-21	09:50:00	BKT	BKT	L9R1R2	J	hatching	0	63.2	56.9	22.2	54.9	41.5	31.3
SS	N	51	14	4	2016-01-21	10:40:00	BBP2	BBP2	L4R1	M	>15	16	194.5	149	64.2	176.1	106.8	860
SS	N	52	14	4	2016-01-22	09:00:00	BKT	BKT	L8R10	F	13	13	196.5	151.9	68.9	184.95	123.2	973
SS	N	77	14	4	2016-01-22	10:12:00	BBP1	BBP1	L9b	J	6	6	137.8	112.2	47.4	120.4	82.95	319.5
SS	R	27	15	4	2016-02-27	09:20:00	BBP2	BBP2	L2R1	J	4	4	90	79.2	34.1	82	55.9	100.2
SS	N	53	15	4	2016-02-25	09:12:00	BKT1	BKT	L9R8	J	1	1	61	59	22	53	39.8	31.2
SS	N	54	15	4	2016-02-26	09:12:00	BKT1	BKT	L9R3	J	1	1	64.2	61.5	23.95	55.8	42.8	35.2
SS	N	55	15	4	2016-02-26	09:12:00	BKT1	BKT	L9R2	J	1	1	59.2	54.8	22.4	52	37	27
SS	N	56	15	4	2016-02-26	09:12:00	BKT1	BKT	L9R1	J	1	1	62.6	59.1	23.1	56.1	41.5	33
SS	N	57	15	4	2016-02-26	09:52:00	BBP2	BBP2	L10R1	J	1	1	65	62.7	22.9	57.8	43	38
SS	N	58	15	4	2016-02-26	09:59:00	BBP2	BBP2	L10R2	J	1-2 years	1	62.2	59.1	23.2	54.5	40.8	33.8
SS	N	74	15	4	2016-02-27	10:10:00	BBP1	BBP1	L9R9	J	2	2	65.8	63.3	25.1	57.5	43.2	39.8
SS	N	75	15	4	2016-02-27	10:15:00	BBP1	BBP1	L4R2	J	2	2	69.2	62.8	26.8	60.5	43.7	41
SS	R	23	16	4	2016-03-16	09:48:00	BBP2	BBP2	L1R9	J	4	4	92.6	85.5	34.8	84	62	114
SS	R	33	16	4	2016-03-16	10:32:00	BBP1	BBP1	L2R10	F	12	12	179.1	143.95	67.2	159.5	111.2	698
SS	R	40	16	4	2016-03-15	10:37:00	BBP1	BBP1	L3R4	J	6	6	117.2	102.8	41.7	105	75.2	213
SS	R	53	16	4	2016-03-15	09:06:00	BKT1	BKT	L9R8	J	1	1	61.5	59.3	22.9	53.5	39.5	31
SS	R	56	16	4	2016-03-15	09:06:00	BKT1	BKT	L9R1	J	1	1	62.2	60.1	23.5	55.4	40	30.9
SS	R	56	16	4	2016-03-15	09:06:00	BKT1	BKT	L9R1	J	1	1	59.1	54.7	22.3	52.2	37	28.4
SS	R	57	16	4	2016-03-15	10:19:00	BBP2	BBP2	L10R1	J	2	2	66.4	64	23.9	58.3	43.8	40
SS	N	59	16	4	2016-03-15	09:06:00	BKT2	BKT	L9R10	J	1	1	69.4	64.1	24.9	58.8	43.8	44
SS	N	60	16	4	2016-03-15	09:06:00	BKT1	BKT	L2R2R3	J	1	1	67.6	61.9	24.1	57	41.4	35
SS	N	61	16	4	2016-03-15	09:06:00	BKT1	BKT	L2R2R9	J	1	1	70.2	64.1	25.3	60.5	43.2	43.5
SS	R	61	16	4	2016-03-16	09:16:00	BKT1	BKT	L2R2R9	J	1	1	70.2	64.1	25.3	60.5	43.2	43.5
SS	R	4	17	5	2016-04-25	11:00:00	BBP1	BBP1	L8	F	8	8	148.3	125.2	60.2	136.7	89.3	413
SS	R	10	17	5	2016-04-24	10:05:00	BBP1	BBP1	R2	M	>15	16	210	154.95	75.1	190.9	115.5	1075
SS	R	34	17	5	2016-04-25	09:25:00	BKT1	BKT	L8R2	J	5	5	101.2	97.2	37.2	92.8	72.1	153
SS	R	48	17	5	2016-04-23	09:40:00	BKT1	BKT	L8R8	J	1	1	63.4	60	23	55.2	40	35
SS	R	50	17	5	2016-04-24	09:50:00	BKT1	BKT	L9R1R2	J	2	2	68.8	62	24.2	59.2	44.3	41
SS	R	53	17	5	2016-04-25	09:15:00	BKT1	BKT	L9R8	J	1	1	62.6	59.2	22.2	54.8	40.3	33
SS	R	54	17	5	2016-04-23	09:30:00	BKT1	BKT	L9R3	J	1	1	67.8	64.2	24.9	58.9	45	42.9
SS	R	54	17	5	2016-04-25	09:25:00	BKT1	BKT	L9R3	J	1	1	67.8	64.2	24.9	58.9	45	42.9
SS	R	55	17	5	2016-04-24	09:25:00	BKT1	BKT	L9R2	J	2	2	62.7	58.1	24.2	55.8	40.2	36.8
SS	R	57	17	5	2016-04-25	10:15:00	BBP2	BBP2	L10R1	J	1	1	67.8	63.8	23.5	60	44	40.5
SS	R	58	17	5	2016-04-25	10:00:00	BBP2	BBP2	L10R2	J	2	2	65.3	61.2	24.1	58.3	42.8	40
SS	R	60	17	5	2016-04-24	09:40:00	BKT1	BKT	L2R2R3	J	2	2	73	65.1	25.2	61.5	44.8	44.8
SS	R	61	17	5	2016-04-25	09:00:00	BKT1	BKT	L2R2R9	J	1	1	73.4	66.9	26.1	63.3	44.8	52.5
SS	N	62	17	5	2016-04-24	10:55:00	BBP2	BBP2	L2R1R2	J	hatching	0	63	58	23.1	57	40.4	34
SS	N	63	17	5	2016-04-25	10:50:00	BBP1	BBP1	L10R8	J	1	1	67.1	61.8	23.9	57.2	43.6	40
SS	R	27	18	5	2016-05-20	09:49:00	BBP2	BBP2	L2R1	J	1	1	64.8	60.2	24.8	59	42.1	41
SS	R	32	18	5	2016-05-19	09:39:00	BBP1	BBP1	L2R9	M	>15	16	177	133.9	63.9	157.5	98.9	103
SS	R	53	18	5	2016-05-20	09:25:00	BKT1	BKT	L9R8	J	1	1	63.1	60.5	23.9	54.8	40.9	39
SS	R	57	18	5	2016-05-19	09:54:00	BBP2	BBP2	L10R1	J	1	1	68.1	64.7	24.8	60.2	44.3	44
SS	R	57	18	5	2016-05-20	09:49:00	BBP2	BBP2	L10R1	J	1	1	68.1	64.7	24.8	60.2	44.3	44
SS	R	58	18	5	2016-05-18	10:08:00	BBP2	BBP2	L10R2	J	2	2	65.3	62.1	24.3	58.8	43	41.5
SS	N	76	18	5	2016-05-18	10:37:00	BBP2	BBP2	L4	J	7	7	137.8	120.1	47.2	126.5	93.8	347
SS	R	77	18	5	2016-05-20	09:49:00	BBP2	BBP2	L9b	J	6	6	128.8	111	44.1	114.2	80.7	285
SS	R	10	19	5	2016-06-05	10:18:00	BBP1	BBP1	R2	M	>15	16	210.1	154.7	74	190.7	115.5	1050
SS	R	15	19	5	2016-06-05	11:03:00	BBP1	BBP1	R9	F	8	8	148.8	118	50.8	129.6	85.1	390
SS	R	23	19	5	2016-06-06	10:35:00	BBP2	BBP2	L1R9	J	5	5	100.8	91.5	38	92.2	66.1	155
SS	R	27	19	5	2016-06-05	11:18:00	BBP2	BBP2	L2R1	J	4	4	93.8	81.8	34.7	86	57.6	116
SS	R	33	19	5	2016-06-06	11:17:00	BBP1	BBP1	L2R10	F	12	12	184.3	146.3	68.7	163.6	115.1	760
SS	R	34	19	5	2016-06-06	09:40:00	BKT1	BKT	L8R2	J	5	5	104.2	99.6	38	95.2	74.8	173
SS	R	48	19	5	2016-06-05	09:49:00	BKT1	BKT	L8R8	J	2	2	65.4	61.6	24.2	58.1	41.2	40
SS	R	51	19	5	2016-06-06	10:30:00	BBP2	BBP2	L4R1	M	>15	16	194.9	148.7	67.9	177	107	885
SS	R	53	19	5	2016-06-06	09:40:00	BKT1	BKT	L9R8	J	1	1	64.7	62.2	23.9	56.9	42.7	40.5
SS	R	55	19	5	2016-06-06	09:40:00	BKT1	BKT	L9R2	J	2	2	69.3	62.1	26.9	61.1	43	50.2
SS	R	60	19	5	2016-06-04	09:57:00	BKT1	BKT	L2R2R3	J	2	2	78.5	69.4	26.9	67	47	55.8
SS	R	60	19	5	2016-06-05	09:49:00	BKT1	BKT	L2R2R3	J	2	2	78.5	69.4	26.9	67	47	55.8
SS	R	74	19	5	2016-06-05	10:18:00	BBP1	BBP1	L9R9	J	2	2	71	66.8	26.9	63	46.5	53.1
SS	R	19	20	5	2016-09-07	10:18:00	BBP1	BBP1	L1R1	F	9	9	150.9	125.3	50.9	132.2	91.2	398
SS	R	48	20	5	2016-09-07	09:58:00	BKT1	BKT	L8R8	J	3	3	79	71.4	28.3	70.9	51.5	71.5
SS	R	50	20	5	2016-09-06	09:55:00	BKT2	BKT	L9R1R2	J	3	3	86.2	77.5	30.2	77.2	56.6	90,5
SS	R	55	20	5	2016-09-06	09:42:00	BKT3	BKT	L9R2	J	3	3	80	73.1	31	72	51.1	74
